# Supplementary material for: Mulinane and Azorellane Diterpenoid Biomarkers by GC-MS from a Representative Apiaceae (Umbelliferae) Species of the Andes
Source: PubMed Central journal article supplement (PMC6412730; doi:10.3390/molecules24040684), 2019-02-14
Supplement: molecules-24-00684-s001.pdf [file molecules-24-00684-s001.pdf]

## Supplemental Materials for

# Mulinane and Azorellane Diterpenoid Biomarkers by GC-MS from a Representative Apiaceae (Umbelliferae) Species of the Andes

Bernd R.T. Simoneit <sup>1,\*</sup>, Daniel R. Oros <sup>2</sup>, Rudolf Jaffé <sup>3</sup>, Alexandra Didyk-Peña <sup>4,\*</sup>, Carlos Areche <sup>5</sup>, Beatriz Sepúlveda <sup>6</sup> and Borys M. Didyk <sup>7</sup>

<sup>1</sup> Department of Chemistry, College of Science, Oregon State University, Corvallis, OR 97331, USA

<sup>2</sup> Consultant, 72 Marina Lakes Drive, Richmond, CA 94804, USA; daniel.r.oros@gmail.com

<sup>3</sup> Southeast Environmental Research Center and Department of Chemistry and Biochemistry, Florida International University, 3000 NE 151st Street, North Miami, FL 33181, USA; jaffer@fiu.edu

<sup>4</sup> Escuela de Química y Farmacia, Facultad de Medicina, Universidad Andres Bello, Viña del Mar 2520000, Chile

<sup>5</sup> Departamento de Química, Facultad de Ciencias, Universidad de Chile, Casilla 653, Santiago 8320000, Chile; areche@uchile.cl

<sup>6</sup> Departamento de Ciencias Químicas, Universidad Andres Bello, Viña del Mar 2520000, Chile; bsepulveda@uc.cl

<sup>7</sup> Consultant, Casilla 942, Viña del Mar 2520000, Chile; bmdidyk@gmail.com

\* Correspondence: Correspondence: simonebe@oregonstate.edu (B.R.T.S.); maria.didyk@unab.cl (A.D.-P.); Tel.: +1-541-737-2081 (B.R.T.S.)

### Contents:

### Standards

**Figure SM-1.** Mass spectra of derivatives, related standards and unknown compounds in *A. compacta* resins.

**Figure SM-2.** Fragmentation schemes indicating the key ions for the mass spectra of the diterpenoids in *A. compacta* resins.

### Standards

The mass spectra of primary, secondary (hydrogenated) and surrogate standards are collected in Figure SM-1. The following standard compounds were not detected in the resin sample of this report, but are provided for future reference: 13 $\alpha$ -hydroxy-14-oxomulin-11-en-20-oic acid (Fig. SM-1j,w,z), 15 $\alpha$ -acetoxymulina-11,13-dien-20-oic acid (Fig. SM-1x), 7 $\beta$ ,13 $\alpha$ -dihydroxymulin-11-ene (Fig. SM-1s), and 18-acetoxymulina-11,13-dien-16,20-dioic acid (Fig. SM-1aa).

**Figure SM-1.** Mass spectra of derivatives, related standards and unknown compounds in *A. compacta* resins. The KI values relative to *n*-alkanes on a DB-5 column are given in parentheses on the mass spectra:

- (a)  $\alpha$ -spathulanol (II),
- (b)  $\beta$ -spathulanol (II),
- (c) spathulanol-TMS (II),
- (d) mulinolic acid (XXVIII, standard),
- (e) 13 $\alpha$ -hydroxyazorellan-20-oic acid (standard, with XXVII),
- (f) 7 $\beta$ -acetoxazorell-13-ene (interpreted based on XXXIII),
- (g) 7 $\alpha$ -acetoxazorell-13-ene (interpreted based on XXXIII),
- (h) methyl mulinolate (XXVIII, standard),

- (i) methyl 13 $\alpha$ -methoxymulin-11-en-20-oate (XXVIII, standard),
- (j) methyl 13 $\alpha$ -hydroxy-14-oxomulin-11-en-20-oate (XXXIV, standard),
- (k) 13-*epi*-azorellanol (XXXIII),
- (l) 7 $\beta$ -hydroxyazorellane-TMS,
- (m) 13 $\alpha$ -hydroxyazorellane-TMS (XVII),
- (n) 13 $\alpha$ -hydroxymulinane-TMS (XVIII),
- (o) 13 $\beta$ (H)-mulina-11,14-dien-20-oic acid-TMS (XIX, standard),
- (p) mulina-11,13-dien-20-oic acid-TMS (XX, standard),
- (q) azorell-13-en-20-oic acid-TMS (XXI, standard),
- (r) 13 $\beta$ (H)-azorellan-20-oic acid-TMS (XXII),
- (s) 13 $\alpha$ (H)-azorellan-20-oic acid-TMS (XXIII),
- (t) 13 $\beta$ (H)-mulinan-20-oic acid-TMS (XXIV, standard),
- (u) 13 $\alpha$ (H)-mulinan-20-oic acid-TMS (XXV, standard),
- (v) azorellanol-TMS (XXXIII, standard),
- (w) 13 $\alpha$ -hydroxy-14-oxomulin-11-en-20-oic acid-20TMS (XXXIV, standard),
- (x) 15 $\alpha$ -acetoxymulina-11,13-dien-20-oic acid-TMS (XXXVI, standard),
- (y) 7 $\beta$ ,13 $\alpha$ -dihydroxymulin-11-ene-diTMS (XXXV, standard),
- (z) 13 $\alpha$ -hydroxy-14-oxomulin-11-en-20-oic acid-diTMS (XXXIV, standard),
- (aa) 18-acetoxymulina-11,13-dien-16,20-dioic acid-diTMS (XXXVII, standard),
- (bb) unknown C<sub>20</sub>H<sub>34</sub>,
- (cc) unknown C<sub>20</sub>H<sub>32</sub>,
- (dd) unknown C<sub>20</sub>H<sub>32</sub>, and
- (ee) unknown C<sub>20</sub>H<sub>32</sub>.

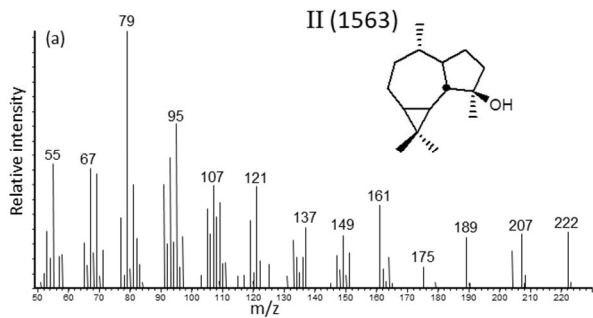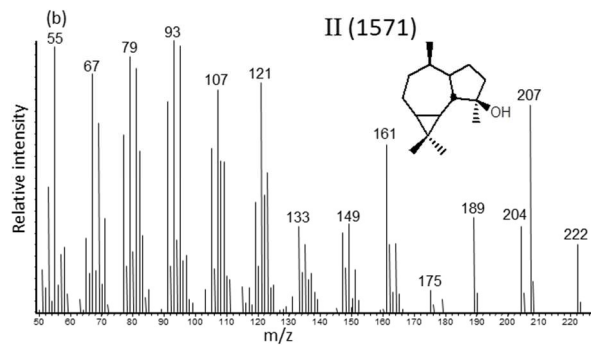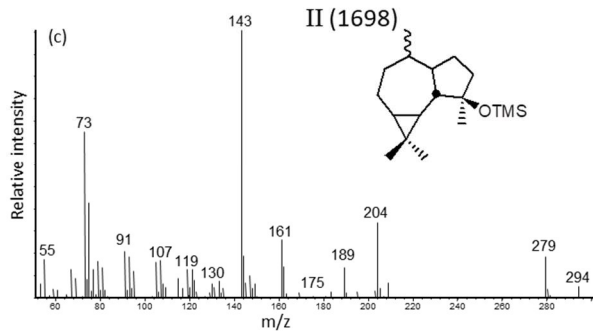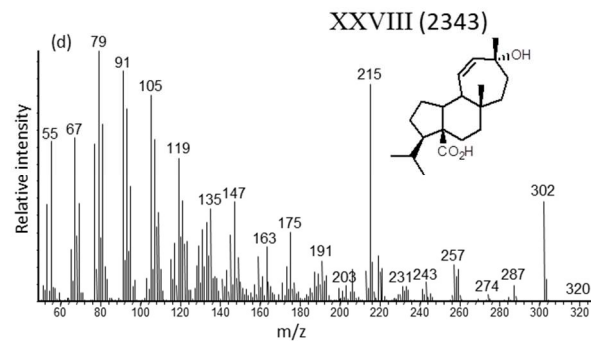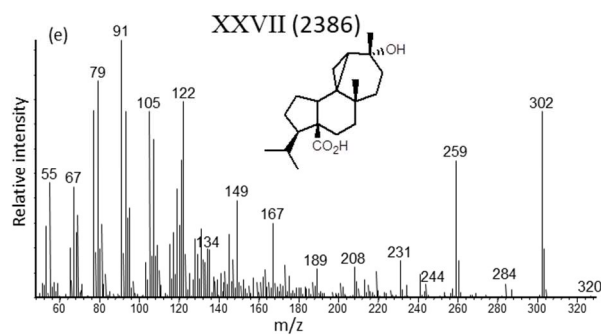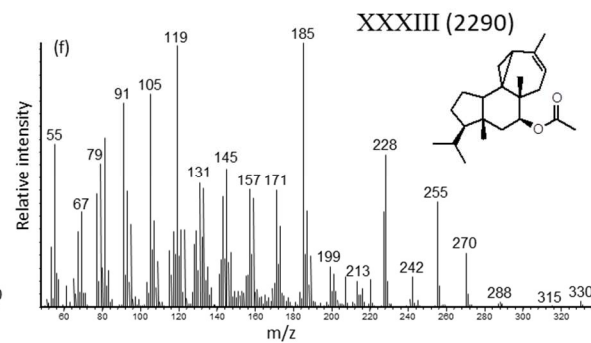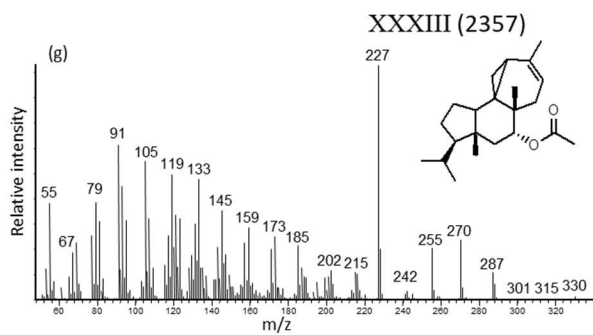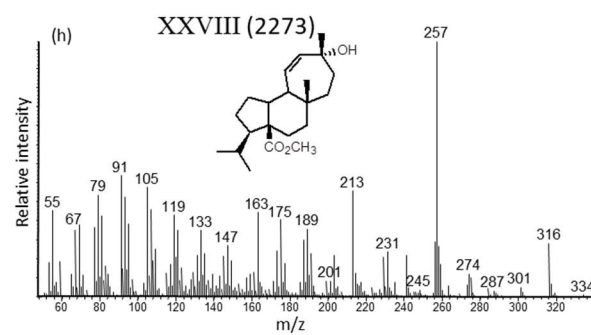

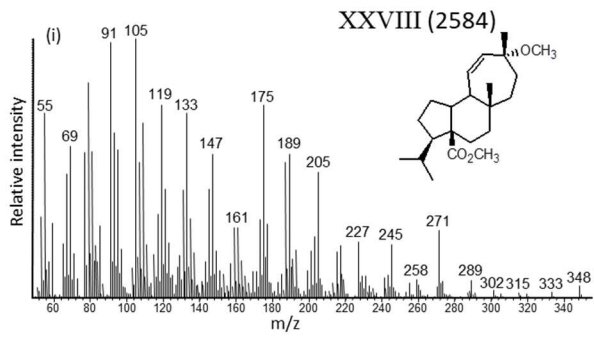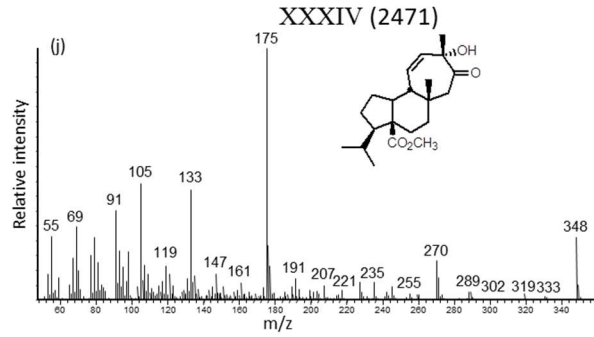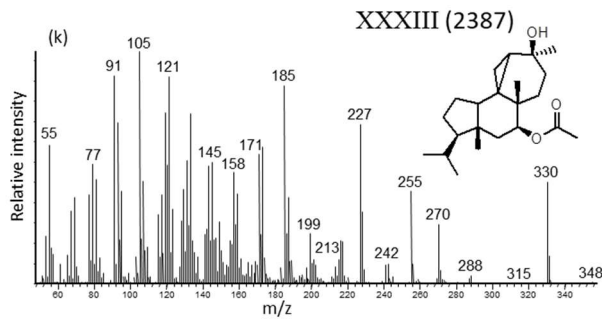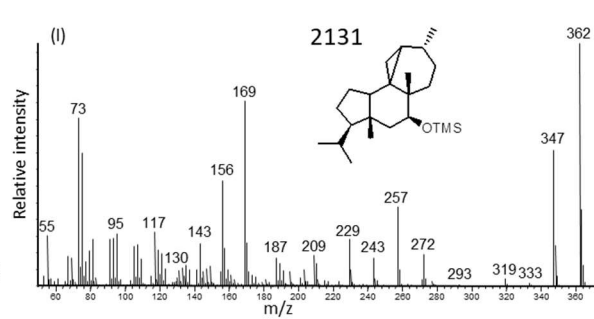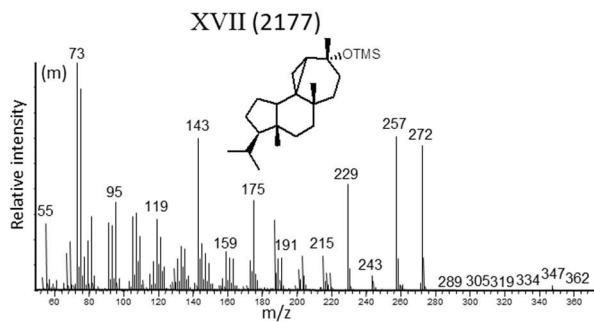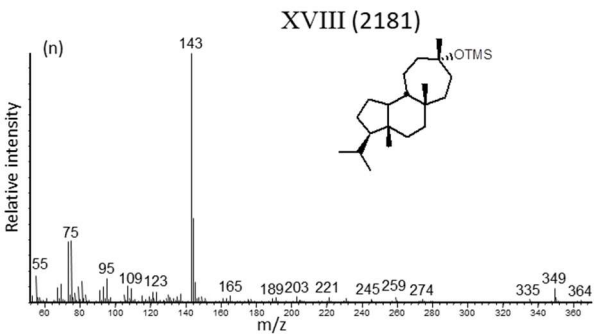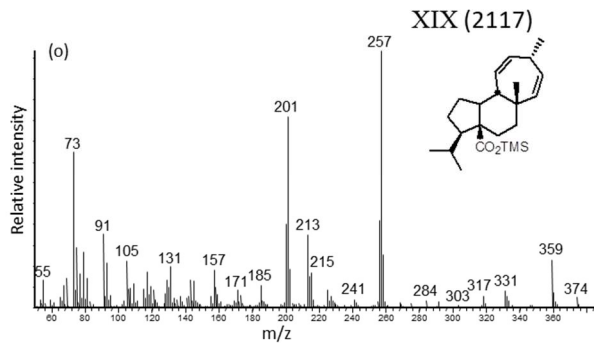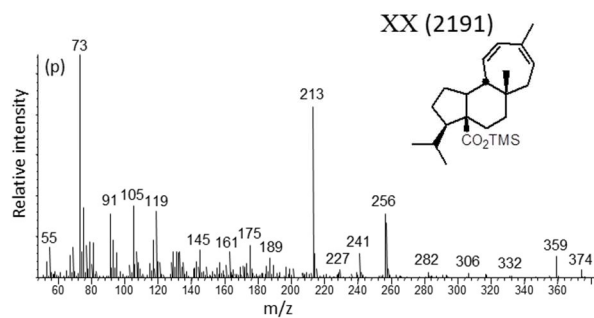

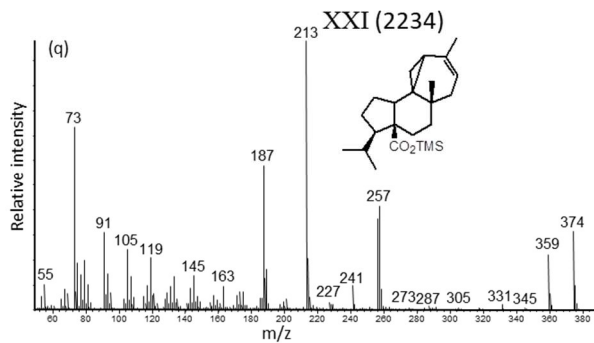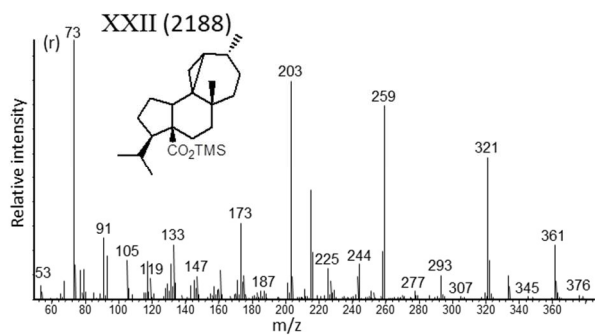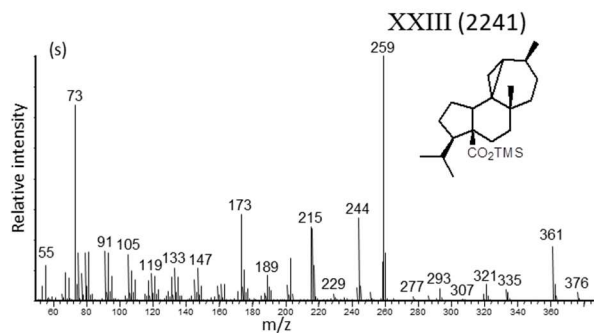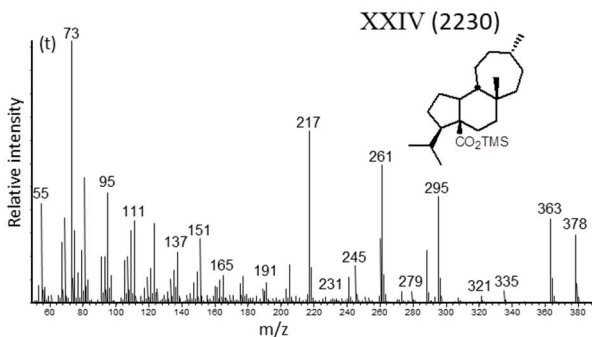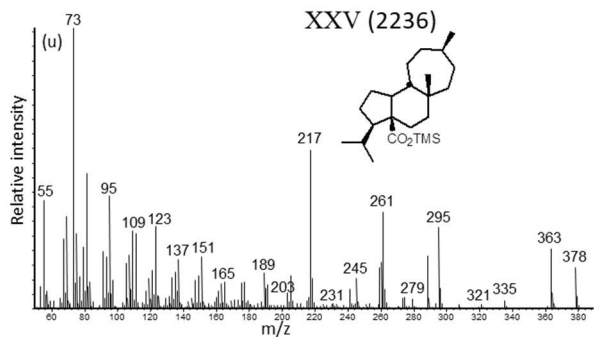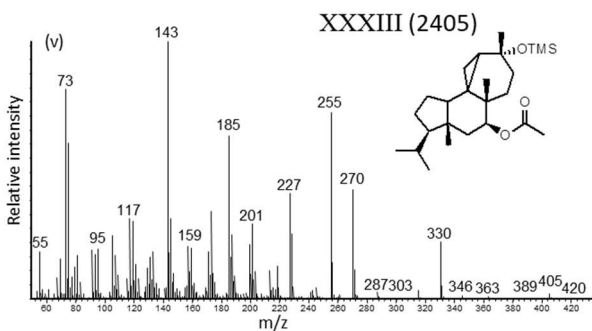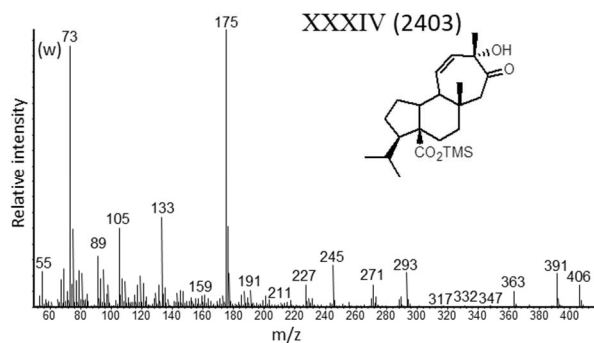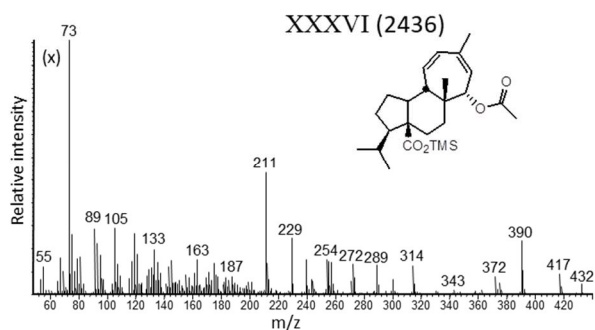

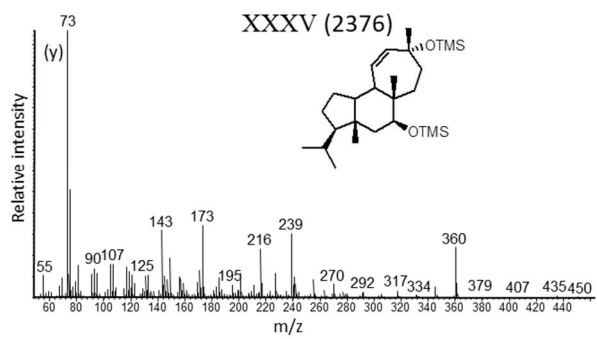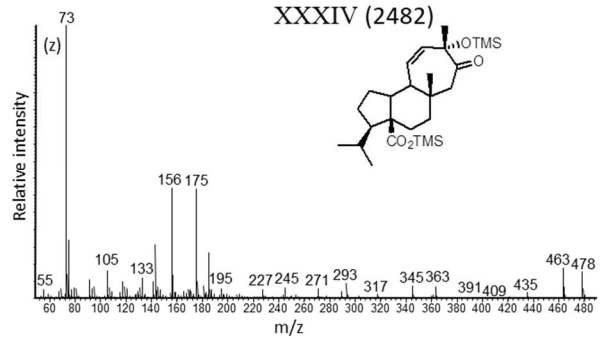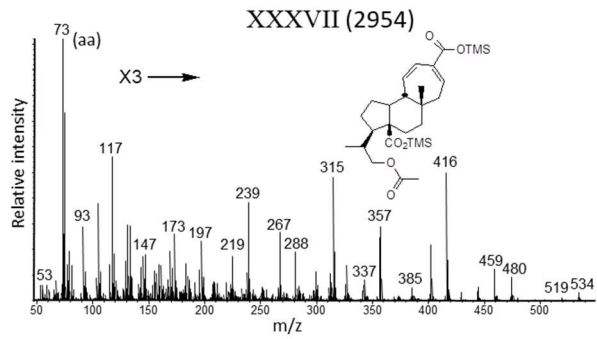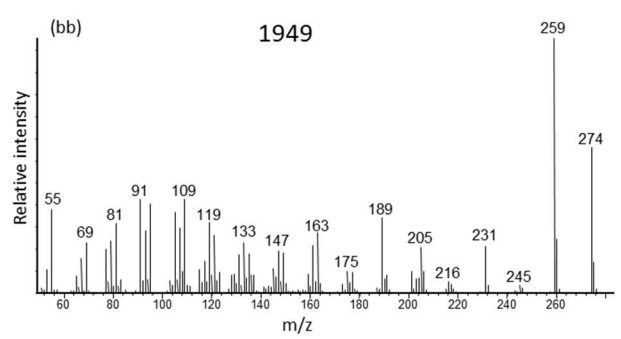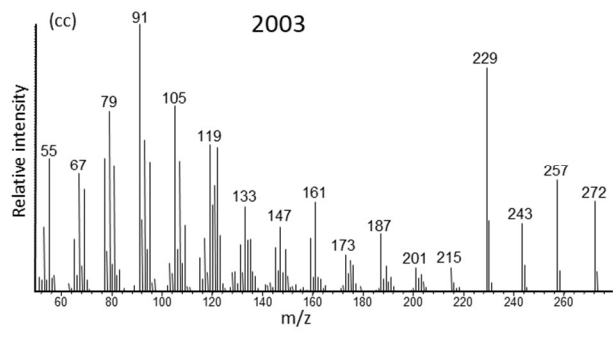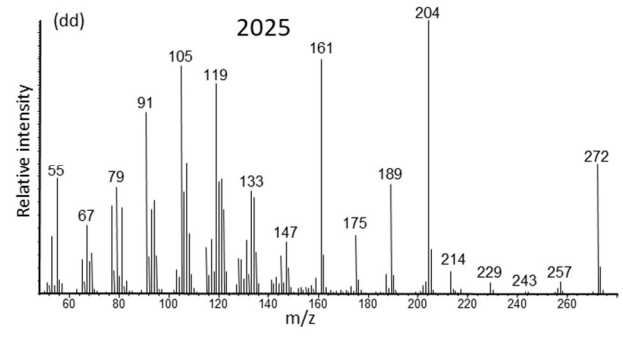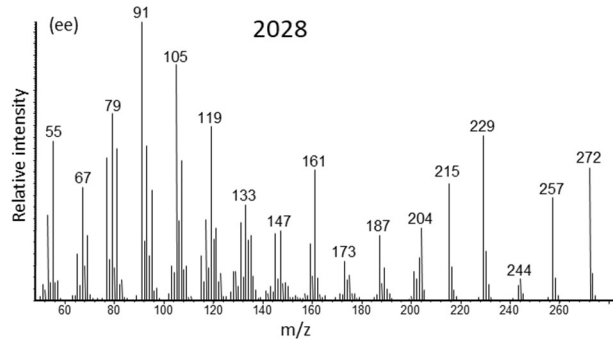

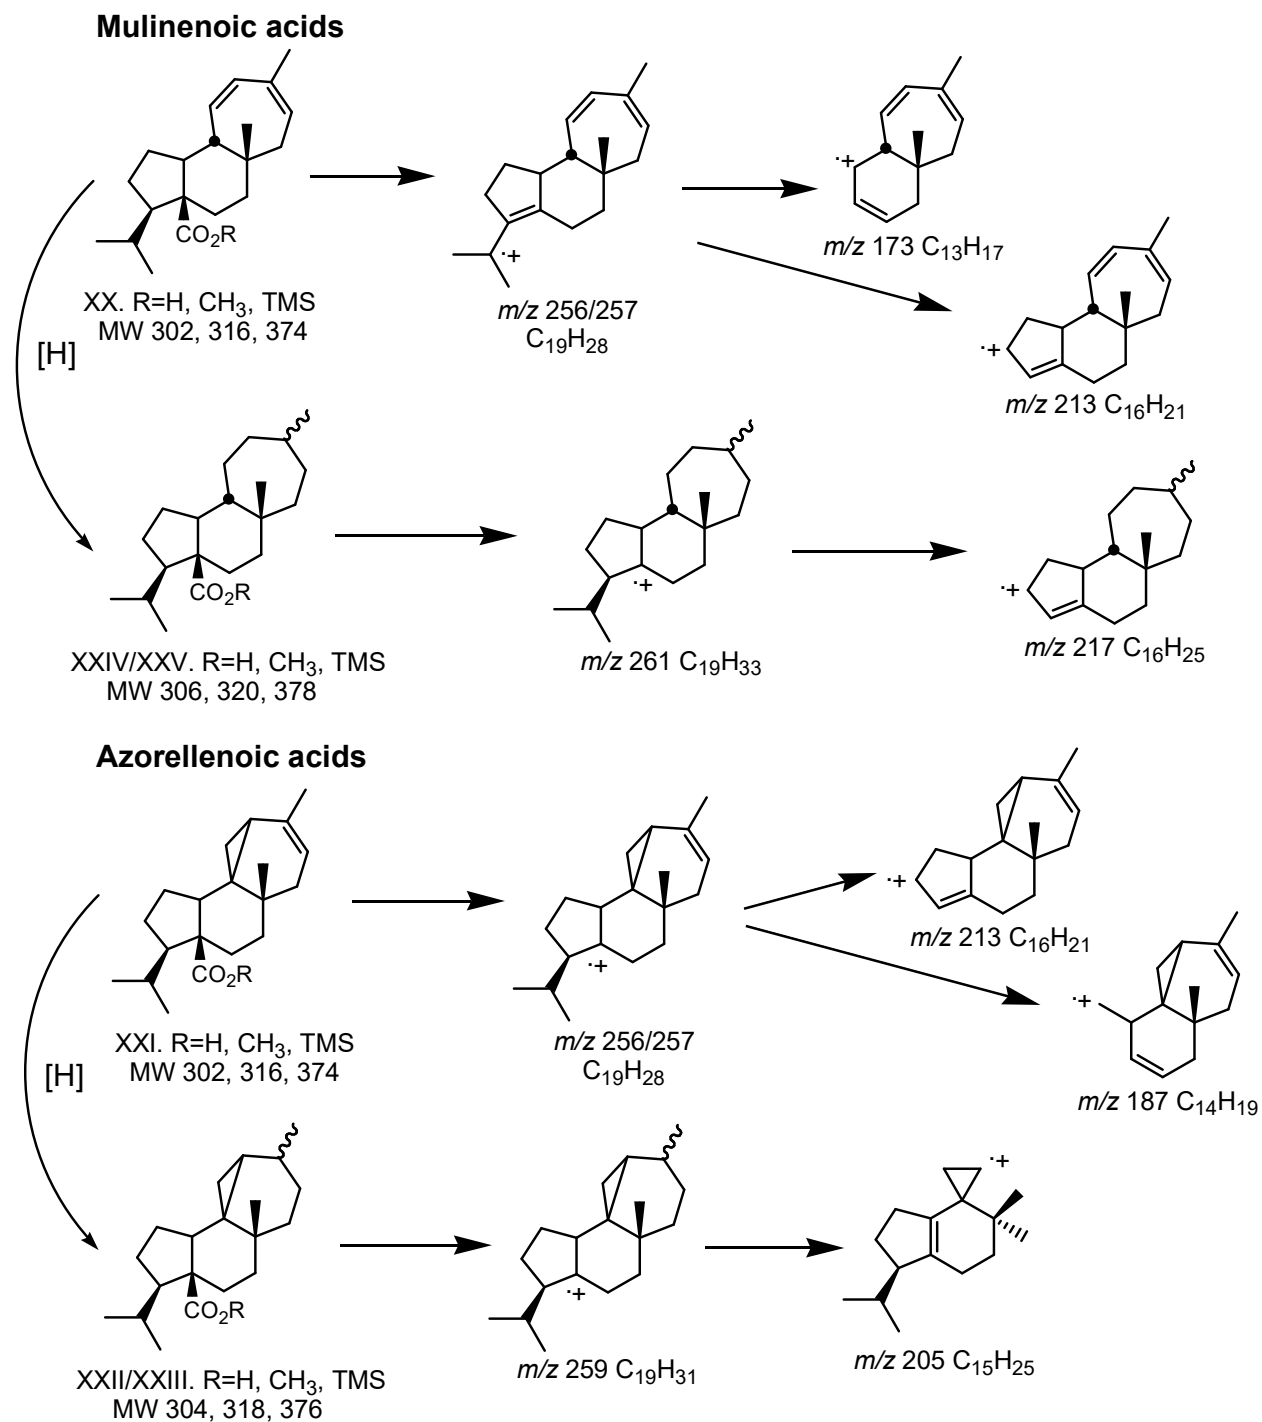

**Figure SM-2a.** Fragmentation scheme indicating the key ions for the mass spectra of the diterpenoid acids in *A. compacta* resin (cf. Fig. 4 in text).

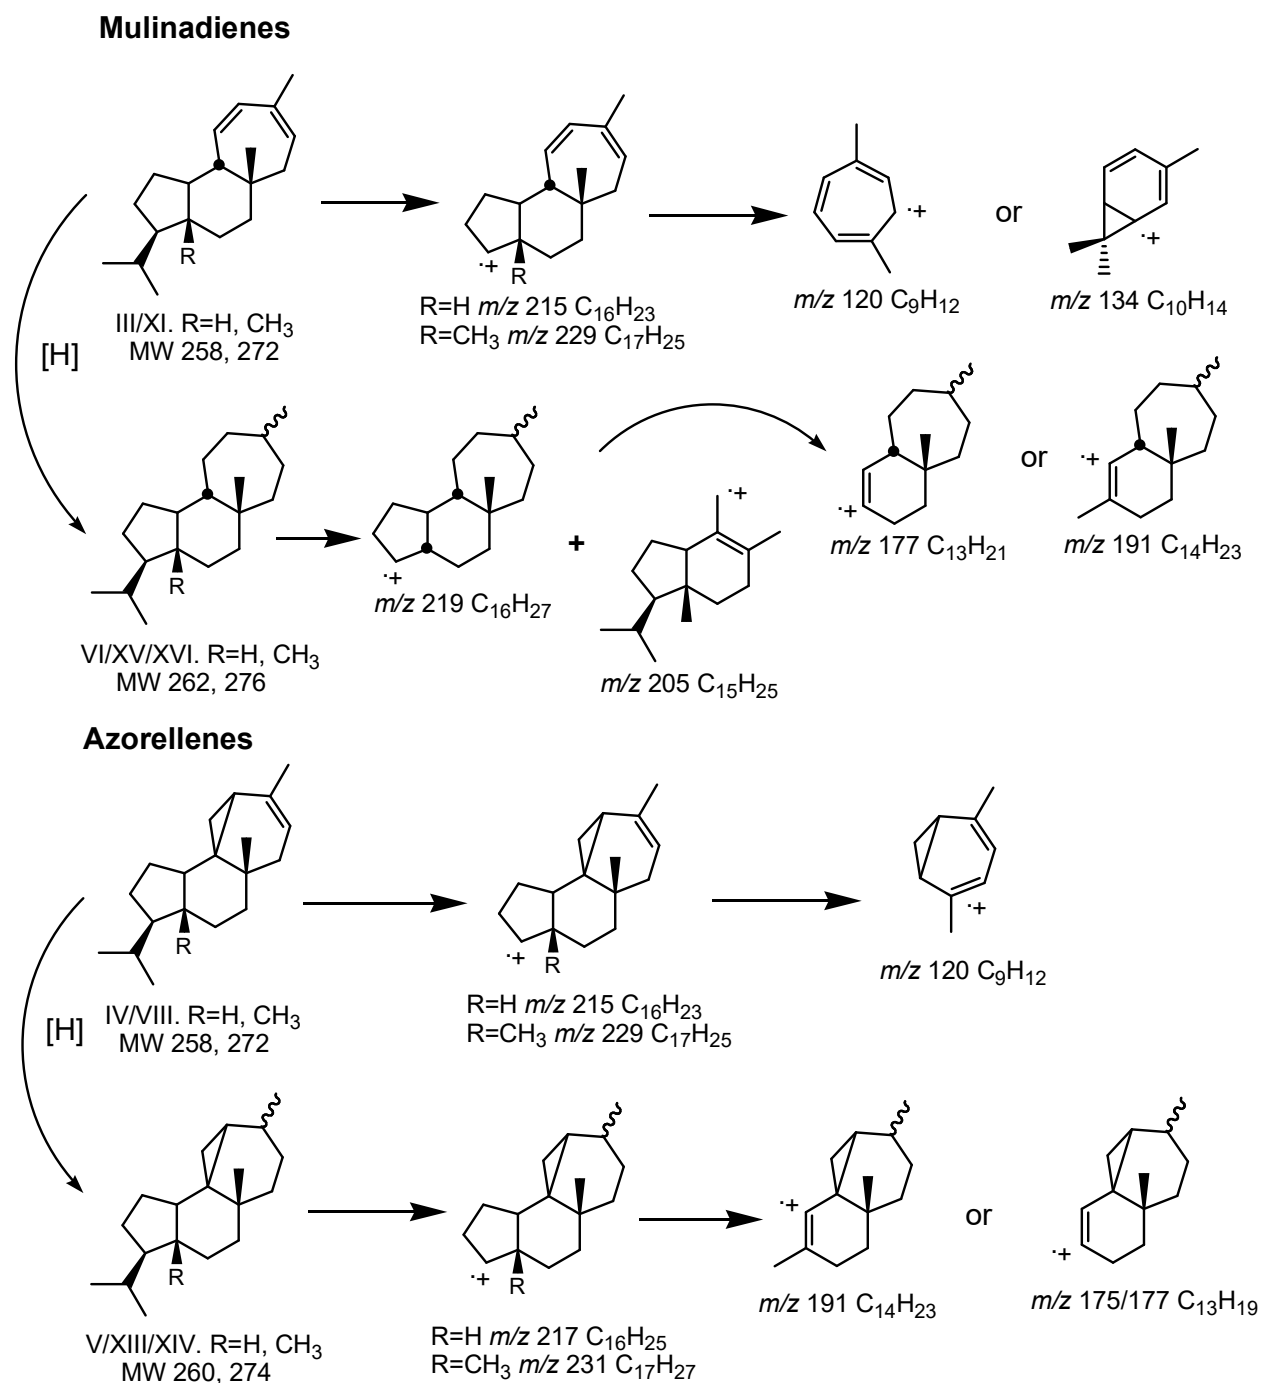

**Figure SM-2b.** Fragmentation scheme indicating the key ions for the mass spectra of the diterpenoid hydrocarbons in *A. compacta* resin (cf. Fig. 3 in text).
